# Supplementary material for: Analysis of Social Determinants of Health and Disability Scores in Leprosy-Affected Persons in Salem, Tamil Nadu, India
Source: MDPI journal article supplement (doi:10.3390/ijerph15122769), 2018-12-06
Supplement: s1 [file s1]

### File S3. Supplementary data.

**Table S1.** Independent variables of regression analysis with Eyes-Hands-Feet (EHF) score as dependent variable in study participants disabled through leprosy.

| Dependent Variable                                                                              | Independent variables |        | Collinearity |           |
|-------------------------------------------------------------------------------------------------|-----------------------|--------|--------------|-----------|
|                                                                                                 | beta                  | P      | VIF          | Tolerance |
| Gender (0 female, 1 male)                                                                       | -0.009                | 0.912  | 1.033        | 0.968     |
| Age                                                                                             | 0.340                 | <0.001 | 1.000        | 1.000     |
| Time after RFT (years)                                                                          | 0.118                 | 0.174  | 1.109        | 0.902     |
| Income (INR/M)                                                                                  | -0.078                | 0.360  | 1.060        | 0.944     |
| Living space (qm <sup>2</sup> )                                                                 | -0.276                | 0.001  | 1.000        | 1.000     |
| VIF – Variance inflation factors; RFT – release from treatment; INR/M – Indian rupee per month. |                       |        |              |           |

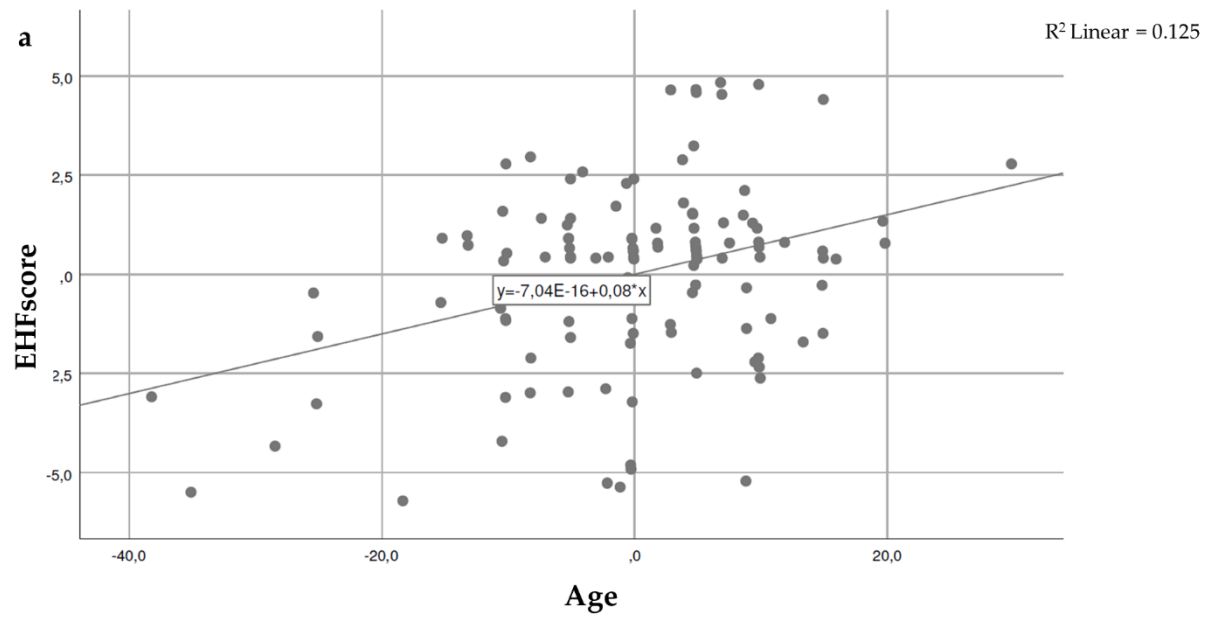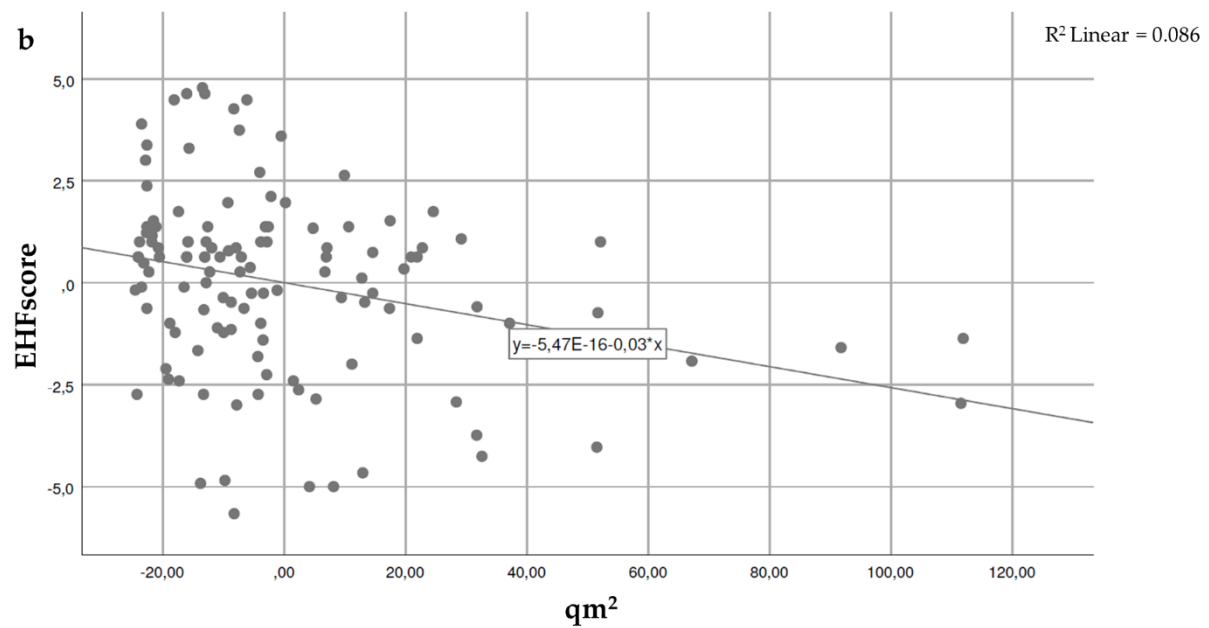

**Figure S1.** Linear regression plots to depict the relationship between the EHF score, **a)** age, and **b)** living space in leprosy affected study participants.
