# Supplementary material for: Analysis of Social Determinants of Health and Disability Scores in Leprosy-Affected Persons in Salem, Tamil Nadu, India
Source: Int J Environ Res Public Health. 2018 Dec 6;15(12):2769. doi: 10.3390/ijerph15122769 (PMC6313506; doi:10.3390/ijerph15122769)
Supplement: Supplementary file 1 [file ijerph-15-02769-s001.zip › File S1 - Dataset.xlsx]

## Sheet: Raw Data
#	Gender	Age	Block	District	House Form	Roof Type	qm2	Rooms	#of People in home	People per Room	Housemates	qm2 per Person	Marital Status	Social Class / Caste	Work	Income / M	DP	Other Support / M	Income of Partner / M	Alcohol	Smoking	Betelnut	Literate	Illiterate	MDT completed	Disabilities Hand	Disabilities Feet	Disabilities eye	EHF Score	Deformities Hand	Deformities Feet	Current Ulcer	Last ulcer site	Last ulcer onset	Last ulcer healed	Running water inside	Distance to Water Source	Underground to Water Source	Toilets	Distance to Toilet	Underground to Toilet	Distance to Kitchen / Food Dispensary	Underground to Kitchen / Food Dispensary	Cooking type	Distance to Work / Social	Underground to Work / Social
16	F	40	Kolathur	Salem	Rented	Tiled	6	1	6	6	w husband, children	1	Married	MBC	0	1000	1		1000	0	0	1		1	MDT - 2010	G2 rt, G1 lt	G2 rt, G1 lt	0	6	rt	rt	0	Plantar rt	2004	2004	0	10	MP	Squat Gov'ment Toilet	25	MP	0	M	Open Fire	75	MGP
81	M	67	Gangavelli	Salem	Own	Thatched	16	2	6	3	w family members	2.66667	Married	SC	0	1000	1		0	0	0	0		1	Dapson - 1970	G2 b	G2 b	0	8	b	b	0	0	-	-	0	10	M / P	Field	150	M / G	0	M	Gas	0	0
31	F	50	Thalaivasal	Krishnagiri	Gov'ment Leprosy Home	Thatched	25	1	9	9	8 children	2.77778	Unmarried	MBC	0	1000	1		0	0	0	1		1	MDT - 2008	G2 b	G2 b	0	8	b	b	2	Plantar rt & lt	1986, 2001	0	0	15	M / G / P	Field	30	M / G / P	125	M / G / P	Gas	20	M / G / P
97	M	63	Thalaivasal	Salem	Own	Thatched	6	1	2	2	w wife	3	Married	SC	0	1000	1		2000	0	0	1		1	MDT - 2006	G2 b	G2 b	0	8	b	b	1	Malleolus rt	09/2016	0	0	10	M	Field	20	M / G	3	M	Open fire	50	M / G / P
48	M	30	Ayyothiyapattanam	Salem	Own	Tiled	9	1	3	3	w wife and son	3	Married	ST	Day work	1500	0		0	1	0	0	1			G2 rt	0	0	2	rt	0	0	0	-	0	0	5	M / G / P	Field	100	M / G / P	3	M	Open fire	1000	M / G / P
120	M	72	Gangavelli	Salem	Own	Corrugated sheet	22	3	6	2	w family members	3.66667	Married	MBC	0	1000	1		3000	0	1	0		1	MDT - 1985	G2 b	G2 b	b Lagophthalmos	12	b	b	0	Plantar rt	2006	2006	0	6	M / P	Field	70	M / G	0	M	Gas	1000	M / G / P
38	F	70	Valappadi	Salem	Own	Tiled	7.5	1	2	2	husband	3.75	Married	SC	0	1000	1		0	0	1	1		1		G2 b	G2 b	0	8	b	b	2	Plantar lt	2015, 2000	0	0	5	P	Field	35	M / G / P	3	P	Gas	0	0
112	M	57	Gangavelli	Salem	Own	Tiled	27	2	7	3.5	w family members	3.85714	Married	SC	0	1000	1		0	0	0	0		1	Dapson - 1970	G2 b	G2 b	rt Lagophthalmos	10	b	b	1	Plantar lt, Malleolus rt	07/2016	0	0	17	M / P	Field	70	M / G / P	5	M / P	Open fire	100	M / G
92	M	81	Omalur	Salem	Brother's House	Tiled	4	1	1	1		4	Separated	BC	0	1000	1		0	0	0	0	1		Dapson 1974	G2 b	G2 b	0	8	b	b	1	Plantar rt	04/2016	0	0	3	P	Field	500	MGP	0	P	Open fire	45	MGP
105	M	70	Ayyothiyapattanam	Salem	Own	Tiled	4	1	1	1		4	Widow	SC	0	1000	1		0	0	0	0		1		G2 b	G2 b	0	8	b	b	0	Plantar	2003	2013	0	3	M / G	Field	150	M / G	0	M	-	0	0
94	M	70	Omalur	Salem	Own, Shed	Thatched	4	1	1	1		4	Married	BC	0	1000	1		0	0	0	0		1	MDT - 1994	G2 b	G2 b	0	8	b	b	1	Toes rt	11/2016	0	0	32	MG	Field	500	MG	0	0	-	340	MGP
63	M	70	Gangavelli	Salem	Own	Thatched	9	1	2	2	w wife	4.5	Married	BC	0	1000	1		1000	0	1	0		1	MDT - 2014	G2 rt, G1 lt	G1 b	0	5	rt	0	0	0	-	-	0	30	M / P	Field	75	M / G / P	2	M	Open fire	250	M / G / P
66	M	80	Salem Block	Salem	Own, DTMC Trust	Concrete	9	1	2	2	wife	4.5	Married	MBC	0	1000	1	10kg Rice	1500	0	0	0		1		G2 b	rt Amputation	0	6	b	rt	0	Tibial rt	1995	2001 - Amputation	0	5	M / G	Squat Toilet	10	M / P	0	P	Open fire	14	M / G / P
46	M	65	Gangavelli	Salem	Own	Tiled	32	2	7	3.5	w family members	4.57143	Married	SC	Day work	1000	0		800	0	0	0	1		MDT - 2014	G1 rt	G1 b	0	2	0	0	0	0	-	-	0	5	P	Field	150	M / G / P	0	P	Gas	150	P
47	M	64	Salem Urban	Salem	Own	Tiled	14	1	3	3	w wife, son	4.66667	Married	BC	Self Employed	3500	0		0	0	1	0		1	MDT - 1989	G2 lt	0	0	2	lt	0	0	0	0	0	0	35	P	Squat Gov'ment Toilet	100	P	2	P	Open Fire	1050	MGP
99	M	60	Thalaivasal	Krishnagiri	Gov'ment Leprosy Home	Thatched	25	1	5	5	w family members	5	Married	MBC	0	1000	1		0	0	0	0		1	MDT - 2011	G2 b	G2 b	0	8	b	b	0	Plantar lt	2013	2013	0	10	M / G / P	Field	50	M / G / P	140	M / G / P	Gas	50	P
80	M	62	Gangavelli	Krishnagiri	Gov'ment Leprosy Home	Corrugated sheet	5	0	1	#DIV/0!		5	Unmarried	MBC	0	1000	1		0	0	1	0		1	Dapson - 1966	G2 b	G2 b	0	8	b	b	0	0	-	0	0	5	P	Field	50	M / G / P	50	M / G / P	Gas	5	M / G / P
82	M	60	Gangavelli	Krishnagiri	Gov'ment Leprosy Home	Corrugated sheet	5	0	1	#DIV/0!		5	Unmarried	MBC	0	1000	1		0	0	0	0		1	Dapson - 1971	G2 b	G2 b	0	8	b	b	1	Malleolus rt	2006	0	0	20	M / P	Field	25	M / G / P	200	M / G / P	Gas	125	M / G / P
39	F	65	Valappadi	Krishnagiri	Gov'ment Leprosy Home	Corrugated sheet	5	0	1	#DIV/0!		5	Unmarried	MBC	0	1000	1		0	0	0	0		1	Dapson - 1976	G2 b	G2 b	rt Lagophthalmos	10	b	b	1	Plantar rt	2006	0	0	5	P	Field	25	M / G / P	150	M / G / P	Gas	15	M / G / P
26	F	80	Gangavelli	Krishnagiri	Gov'ment Leprosy Home	Corrugated sheet	5	0	1	#DIV/0!		5	Unmarried	MBC	0	1000	1		0	0	0	0		1	Dapson - 1976	G2 b	G2 b	0	8	b	b	3	Plantar rt & lt, Malleolus lt	1986, 1986, 1986	0	0	5	M / P	Field	25	M / G / P	150	M / G / P	Gas	40	M / G / P
121	M	80	Gangavelli	Krishnagiri	Gov'ment Leprosy Home	Corrugated sheet	5	0	1	#DIV/0!		5	Married	MBC	0	1000	1		0	0	0	0		1	MDT - 1986	G2 b	G2 b	b Lagophthalmos	12	b	b	1	Plantar rt	1986	0	0	5	P	Field	50	M / G / P	50	M / G / P	Gas	0	0
41	F	60	Salem Urban	Krishnagiri	Gov'ment Leprosy Home	Corrugated sheet	5	0	1	#DIV/0!		5	Unmarried	MBC	Self Employed	1040	1		0	0	1	1		1	MDT - 1991	G2 b	G2 b	rt Lagophthalmos	10	b	b	1	Plantar lt	2006	0	0	5	P	Field	25	M / G / P	150	M / G / P	Gas	500	M / G / P
6	F	60	Kolathur	Krishnagiri	Gov'ment Leprosy Home	Corrugated sheet	5	0	1	#DIV/0!		5	Unmarried	MBC	0	1000	1		0	0	0	0		1	MDT - 2006	0	G2 b	rt Lagophthalmos	6	0	b	0	0	-	0	0	5	P	Field	25	M / G / P	150	M / G / P	Gas	15	M / G / P
111	M	60	Thalaivasal	Krishnagiri	Gov'ment Leprosy Home	Corrugated sheet	5	0	1	#DIV/0!		5	Unmarried	MBC	0	1000	1		0	1	1	0		1	MDT - 2013	G2 rt, G1 lt	G2 b	rt Lagophthalmos	9	b	b	1	Plantar rt	2013	0	0	5	P	Field	20	M / P	75	P	Gas	200	P
88	M	75	Konganapuram	Salem	Own, DTMC Trust	Tiled	16	2	3	1.5	w wife and sister	5.33333	Married	MBC	0	1000	1		0	0	1	0		1	Dapson - 1976	G2 b	G2 b	0	8	b	b	0	Plantar rt	1976	1976	0	50	P	Field	250	MGP	5	P	Open Fire	15	MP
50	M	57	Gangavelli	Salem	Own	Thatched	29	3	5	1.66667	w family members	5.8	Married	SC	0	1000	1		1500	0	0	0		1	MDT - 1996	0	G2 b	0	4	0	b	1	Plantar lt	05/2016	0	0	20	P	Field	1000	M / G / P	0	P	Gas	100	M / G / P
37	F	70	Gangavalli	Salem	Own	Tiled	35	2	6	3	family member	5.83333	Widow	MBC	0	1000	1		0	0	0	0		1		G2 b	G2 b	0	8	b	b	2	Plantar lt, Halux rt	2001, 1996	0	0	5	M	Squat Gov'ment Toilet	50	M	0	P	Gas	1000	M / G
96	M	67	Panamarathupatti	Salem	Own	Corrugated sheet	35	1	6	6	w family members	5.83333	Married	MBC	0	1000	1		1500	0	0	0		1	MDT - 2001	G2 b	G2 b	0	8	b	b	1	Ankle lt	2014	0	0	15	MG	Field	50	MG	0	M	Gas	0	0
25	F	58	Gangavelli	Salem	Own	Corrugated sheet	6	1	1	1		6	Widow	BC	0	1000	1		0	0	1	0		1	Dapson - 1976	G2 b	G2 b	lt Iridocyclitis	8	b	b	0	Tibial lt, Plantar	2010, 2006	2010, 2006	0	40	M / G	Squat Gov'ment Toilet	30	M / G	2	M	Open fire	10	M / G
101	M	65	Omalur	Salem	Own, Gov'ment House	Concrete	6	1	1	1		6	Widow	SC	Day work	1000	1		0	1	0	0		1		G2 b	G2 b	0	8	b	b	1	Plantar lt	1991	0	0	100	M / G / P	Field	400	M / G / P	0	M	Open fire	500	M / G / P
22	F	70	Salem Urban	Salem	Daughter's	Tiled	12	1	2	2	w daughter	6	Married	SC	0	1000	1		0	0	0	0		1	Dapson - 1966	G2 b	G2 b	0	8	b	b	0	Plantar lt	07/2016	11/2016	0	34	P	Field	60	MGP	0	P	Gas	250	MP
20	F	65	Ayyothiyapattanam	Krishnagiri	Gov'ment Leprosy Home	Thatched	12	1	2	2	husband	6	Married	MBC	0	1000	1		0	0	0	1		1	Dapson - 1964	G2 b	G2 b	0	8	b	b	1	Plantar lt	1986	0	0	5	P	Field	30	M / G / P	150	M / G / P	Gas	100	M / G / P
106	M	70	Omalur	Salem	Own	Tiled	12	1	2	2	wife	6	Married	MBC	0	1000	1		0	0	1	0		1		G2 b	G2 b	0	8	b	b	1	Malleolus rt	2016	0	0	20	P	Bed	0	nil	0	M	Open fire	0	0
21	F	80	Konganapuram	Salem	Own, Shed	Thatched	12	1	2	2	w husband	6	Married	SC	0	1000	1		1000	0	0	0		1	Dapson - 1966	G2 b	G2 b	0	8	b	b	0	Plantar lt	2012	2012	0	7	MG	Field	100	MP	3	P	Open Fire	15	MP
58	M	75	Salem Urban	Salem	Son's	Tiled	30	1	5	5	w son, family	6	Married	SC	0	1000	1		0	0	0	0		1	MDT - 1996	G1 b	G2 rt, G1 lt	0	5	0	rt	0	Plantar rt	2006	2006	0	5	M	Field	150	MGP	0	P	Gas	0	-
40	F	70	Salem Urban	Salem	Own, Damien	Tiled	38	4	6	1.5	w family	6.33333	Married	SC	0	1000	1		0	0	0	0		1	Dapson - 1976	G2 b	G2 b	Lagophthalmos lt	10	b	b	0	Plantar rt		2006	0	7	P	Squat Gov'ment Toilet	850	P	0	P	Open Fire	35	MGP
32	F	60	Veerapandy	Salem	Own, Shed	Thatched	6.5	1	1	1		6.5	Married	SC	Self Employed	1000	1		0	0	0	1		1	MDT - 2013	G2 b	G2 b	0	8	b	b	0	Plantar rt		2013	0	8	MG	Field	75	MG	2	M	Open Fire	15	MGP
72	M	50	Veerapandy	Salem	Own	Concrete	40	2	6	3	w wife, children	6.66667	Married	SC	0	0	0		0	0	0	0	1		Dapson - 1972	G2 rt, G1 lt	G2 lt, G1 rt	0	6	rt	rt	0	Big toe lt	1996	2014	1	0	P	Squat Gov'ment Toilet	250	MGP	5	MP	Open Fire	250	MGP
14	F	74	Veerapandy	Salem	Own	Thatched	14	1	2	2	w husband	7	Married	MBC	Self Employed	1000	1		1000	0	0	0		1	Dapson - 1972	G2 lt, G1 rt	G2 lt, G1 rt	0	6	lt	lt	0	Plantar lt	1996	1996	0	750	MG	Field	30	MG	2	M	Open Fire	2000	MG
104	M	70	Valappadi	Salem	Own	Thatched	21	1	3	3	2 children	7	Widow	SC	Day Work	1000	1		0	1	0	0		1		G2 b	G2 b	0	8	b	b	1	Plantar	2001	0	0	15	P	Field	30	M / G / P	0	P	Open fire	100	M / G / P
108	M	85	Ayyothiyapattanam	Salem	Own	Tiled	42	2	6	3	w family members	7	Married	ST	Day work	0	0		1000	0	0	0		1		G2 b	G2 b	0	8	b	b	0	0	1986	1986	0	10	M / P	Field	50	M / G / P	0	P	Gas	500	M / G / P
70	M	55	Ayyothiyapattanam	Salem	Own	Tiled	42	2	6	3	w family members	7	Married	BC	Day work	1500	0		2500	0	0	0		1		G2 rt	G1 b	0	6	rt	0	0	0	-	0	0	10	M / P	Field	50	M / G / P	0	P	Gas	1000	M / G / P
119	M	68	Konganapuram	Salem	Son's House	Thatched	14.5	2	2	1	w wife	7.25	Married	SC	0	1000	1		0	0	0	1		1	Dapson - 1981	G2 b	G2 b	b Lagophthalmos	12	b	b	0	Plantar rt	2011	2011	0	10	MP	Field	100	MP	0	P	Gas	100	M
77	M	65	Salem Urban	Salem	Own	Concrete	15	1	2	2	w brother	7.5	Widow	ST	0	0	0		0	0	1	0		1	Dapson - 1966	G2 rt, G1 lt	G2 b	0	7	rt	b	0	Plantar lt	1996	2014	0	20	P	Bed	0	P	0	P	-	0	-
57	M	75	Salem Urban	Salem	Own	Concrete	15	1	2	2	w brother	7.5	Married	ST	0	1000	1		0	0	0	0		1	Dapson - 1966	G1 b	G2 rt, G1 lt	0	5	0	rt	0	Plantar rt		2014	0	20	P	Bed	0	P	0	P	-	0	-
118	M	70	Gangavelli	Salem	Own	Tiled	15	1	2	2	w wife	7.5	Married	BC	0	1000	1		0	0	0	0		1	Dapson - 1976	G2 b	G2 b	blind	12	b	b	0	Plantar lt & rt	2011	2011	0	110	P	Sit down	20	P	5	P	Gas	0	0
91	M	70	Thalaivasal	Salem	Own	Corrugated sheet	15	1	2	2	w wife	7.5	Married	MBC	0	1000	1		1000	0	0	0	1		Dapson - 1986	G2 b	G2 b	0	8	b	b	0	Plantar lt & rt	1996	1996	0	10	M / G	Field	25	M / G	3	M / G	Open fire	0	0
30	F	70	Thalaivasal	Salem	Own	Thatched	15	1	2	2	w husband	7.5	Married	BC	Day work	1000	1		0	0	0	1		1	MDT - 2006	G2 b	G2 b	0	8	b	b	0	Toe rt, Finger lt	2011	2011	0	10	M / G / P	Field	100	M / G	0	M / G	Open fire	0	0
62	M	65	Panamarathupatti	Salem	Own	Tiled	39	3	5	1.66667	w wife, sons	7.8	Married	MBC	Day work	1500	1		0	0	0	0	1		Dapson - 1986	G2 rt, G1 lt	G1 b	0	5	rt	0	0	0	0	0	0	30	MGP	Field	50	MG	0	P	Gas	500	MGP
4	F	57	Panamarathupatti	Salem	Own	Tiled	24	2	3	1.5	w husband & second wife	8	Married	MBC	Day work	1000	0		0	0	0	0		1	MDT - 2006	G2 lt, G1 rt	G1 b	0	5	lt	0	0	0	0	0	0	25	MGP	Field	50	MG	0	P	Open fire	10	MP
36	F	60	Ayyothiyapattanam	Salem	Own	Tiled	24.5	2	3	1.5	2 grandchildren	8.16667	Married	SC	0	1000	1		0	0	0	1		1		G2 b	G2 b	0	8	b	b	1	Plantar lt	2006	0	0	1	P	Field	200	M / G / P	0	P	Electric	0	0
54	M	27	Kolathur	Salem	Father's	Concrete	25	2	3	1.5	w mother and father	8.33333	Unmarried	MBC	Employed	5300	0		0	0	0	0	1		MDT - 2011	G1 b	G1 b	0	4	0	0	0	0	0	0	0	25	P	Squat Gov'ment Toilet	250	P	0	P	Gas	1500	P
23	F	70	Veerapandy	Salem	Own	Tiled	17.5	1	2	2	w daughter	8.75	Widow	MBC	0	1000	1	10kg Rice	0	0	0	0		1	Dapson - 1966	G2 b	G2 b	0	8	b	b	0	Plantar rt	1996	1996	0	7	MP	Field	17	MP	7	MP	Open Fire	1500	MGP
73	M	80	Salem Urban	Salem	Own	Tiled	17.5	1	2	2	w wife	8.75	Married	MBC	0	1000	1		500	0	0	0		1	Dapson - 1966	G2 b	G2 lt, G1 rt	0	7	b	lt	0	Plantar lt	2006	2006	0	5	P	Field	550	MGP	0	P	-	100	MP
15	F	68	Konganapuram	Salem	Own	Tiled	18	3	2	0.666667	w husband	9	Married	SC	0	1000	1		0	0	0	1		1	MDT - 1996	G2 lt, G1 rt	G2 rt, G1 lt	0	6	lt	rt	0	Plantar lt & rt	2010	2010	0	2	P	Squat Toilet	3	P	2	P	Open Fire	0	0
68	M	65	Thalaivasal	Salem	Own	Thatched	9	1	1	1		9	Married	SC	0	1000	1		0	0	0	0		1	Dapson - 1966	G2 lt, G1 rt	G2 lt, G1 rt	0	6	lt	lt	0	Foot-Dorsum lt, Finger lt	2006	2006	0	25	M / G / P	Field	300	M / G / P	3	M / G / P	Open fire	50	M / G / P
2	F	63	Salem Urban	Salem	Own	Concrete	18	2	2	1	w daughter	9	Widow	MBC	Self Employed	1500	1		0	0	0	0		1	MDT - 1989	0	G2 lt	0	2	0	lt	0	Plantar lt	2013	2013	0	10	P	Squat	10	GP	0	P	Gas	0	-
75	M	70	Gangavelli	Salem	Own	Thatched	18	2	2	1	w wife	9	Married	BC	Day work	1000	1		2500	1	1	1		1	MDT - 2006	G2 b	G2 lt, G1 rt	0	7	b	0	0	Plantar lt	2006	2006	0	7	M	Field	200	M / G	0	M	Open fire	50	M / P
35	F	52	Ayyothiyapattanam	Salem	Own	Tiled	18	1	2	2	husband	9	Married	MBC	0	1000	1		2000	0	0	0	1			G2 b	G2 b	0	8	b	b	0	Malleolus rt	2015	2016 - Granulated	0	10	P	Squat Toilet	7	P / M	0	P	Gas	25	M / G / P
56	M	40	Ayyothiyapattanam	Salem	Own	Thatched	18	1	2	2	w mother	9	Unmarried	ST	0	1000	1		0	0	1	0		1		G2 lt	G2 lt	0	4	lt	lt	1	Plantar lt	1986	0	0	30	M / P	Field	100	M / G / P	3	P	Open fire	300	M / G / P
102	M	52	Omalur	Salem	Own, Damien Foundation	Concrete	27.5	3	3	1	wife & son	9.16667	Married	MBC	Employed	6800	0		0	0	0	0		1		G2 b	G2 b	0	8	b	0	0	Plantar	07/2016	06/2016	0	15	M / G	Squat Toilet	0	nil	0	P	Gas	1750	M / G / P
98	M	64	Thalaivasal	Salem	Own	Concrete	57	2	6	3	w family members	9.5	Married	SC	0	1000	1		1000	1	0	1		1	MDT - 2011	G2 b	G2 b	0	8	b	0	0	0	-	-	0	5	M / G	Field	50	M / G	3	M / G	Open fire	5	M / G
90	M	74	Gangavelli	Salem	Rented	Tiled	48	2	5	2.5	w family members	9.6	Married	MBC	0	1000	1	10kg Rice	0	0	1	0		1	Dapson - 1980	G2 b	G2 b	0	8	b	b	1	Plantar lt & rt	2001	0	0	30	M / G	Sit down Gov'ment	60	M / G	0	P	Gas	300	M / G
53	M	65	Mechery	Salem	Own	Thatched	20	3	2	0.666667	w wife	10	Married	SC	0	0	0		0	0	0	1		1	MDT - 2016	G1 b	G1 b	0	4	0	0	0	0	0	0	0	12	MP	Field	350	MGP	7	MP	Open Fire	0	0
93	M	55	Gangavelli	Salem	Brother's Son House	Corrugated sheet	10	1	1	1		10	Unmarried	SC	Day Work	1000	1		0	1	1	0		1	MDT - 1986	G2 b	G2 b	0	8	b	b	1	Plantar lt & rt	2013	0	0	4	M	Field	70	M / G	3	M	Open fire	200	M / G
8	F	68	Konganapuram	Salem	Own	Tiled	10	1	1	1		10	Unmarried	SC	0	1000	1		0	0	0	1		1	Dapson - 1972	G2 b	G1 b	0	6	b	0	0	0	0	0	0	30	MP	Field	100	MP	2	P	Open Fire	15	MP
123	M	72	Gangavelli	Salem	Own, Shed	Thatched	10	1	1	1		10	Widow	SC	0	1000	1		0	0	0	0		1	MDT - 2006	G2 b	G2 b	b Lagophthalmos, lt blind	12	b	b	0	Plantar lt & rt	2006	2006	0	10	M / P	Field	10	M / G	15	M	Open fire	0	0
86	M	67	Thalaivasal	Salem	Own	Thatched	20	2	2	1	w wife	10	Married	SC	0	1000	1		1000	0	0	0		1	Dapson - 1976	G2 b	G1 b	lt Lagophthalmos	8	b	0	0	0	-	-	0	7	P	Field	150	M / G / P	0	P	Electric	150	M / P
122	M	75	Kolathur	Salem	Own	Tiled	20	2	2	1	w wife	10	Married	SC	0	0	0		1000	1	1	0		1	MDT - 2001	G2 b	G2 b	Lagophthalmos b	12	b	b	0	Plantar rt	1986	2013	0	13	M	Field	200	MGP	0	P	Gas	500	MGP
114	M	55	Salem Urban	Salem	Own, DTMC Trust	Corrugated sheet	20	2	2	1	wife	10	Married	BC	0	1000	1		0	0	0	0		1		G2 b	G2 b	b blind	10	b	b	0	Plantar	2005	2006	0	20	P	Squat Toilet	0	P	5	P	Open fire	0	0
1	F	47	Salem Urban	Salem	Own	Thatched	40	3	4	1.33333	w family	10	Married	BC	Self Employed	5000	0		0	0	0	0	1		Dapson - 1985	0	G1 lt	0	1	0	0	1	Tibial lt	2013	0	1	0	P	Squat	0	P	0	P	Gas	10	-
44	M	74	Gangavelli	Salem	Own	Thatched	20	1	2	2	w wife	10	Married	ST	Day work	2000	1		0	0	1	0		1	MDT - 2006	0	G2 lt	0	2	0	0	0	0	-	-	0	5	P	Field	150	M / G / P	0	P	Gas	100	P
85	M	85	Panamarathupatti	Salem	Son's House	Corrugated sheet	20	0	2	#DIV/0!	w wife	10	Married	SC	0	1000	1		1000	0	1	0		1	Dapson - 1976	G2 b	G2 b	0	8	b	b	1	Big toe lt	08/2016	0	0	2	M	Field	20	MG	0	M	Open Fire	0	0
69	M	60	Ayyothiyapattanam	Salem	Own	Tiled	21	1	2	2	w wife	10.5	Married	ST	0	1000	1		4800	1	1	0		1		G2 lt, G1 rt	G2 rt, G1 lt	0	6	lt	rt	1	Plantar rt	1986	0	0	25	M / P	Field	100	M / G / P	0	P	Gas	0	0
103	M	75	Gangavalli	Salem	Own	Corrugated sheet	21	1	2	2	wife	10.5	Married	MBC	Day work	1800	1		0	0	0	0	1			G2 b	G2 b	0	8	b	b	2	Plantar rt & lt	2006, 2006	0	0	3	P	Field	50	M / G / P	0	P	-	40	M / G
60	M	75	Gangavelli	Salem	Own	Concrete	24	4	2	0.5	w wife	12	Married	MBC	0	1000	1		0	0	1	0		1	MDT - 1986	G2 lt	G2 rt, G1 lt	0	5	lt	rt	0	Plantar rt	2006	2006	0	3	M	Squat Toilet	5	M / P	3	M / P	Open fire	250	M / G
79	M	65	Gangavelli	Salem	Own	Thatched	12	1	1	1		12	Unmarried	MBC	0	1000	1		0	0	1	0		1	Dapson - 1960	G2 b	G2 b	0	8	b	b	1	Foot-Dorsum lt	10/2016	0	0	20	M / P	Field	50	M / G/ P	0	P	Open fire	70	M / G
117	M	70	Thalaivasal	Salem	Own	Thatched	12	1	1	1		12	Married	MBC	0	1000	1		0	0	0	0		1	Dapson - 1976	G2 b	G2 b	lt blind, rt Lagophthalmos	12	b	b	0	Plantar lt & rt	1996	2013	0	75	M / G / P	Field	20	M / G	0	M	Open fire	200	M / G
113	M	61	Salem Block	Salem	Own, Gov'ment House	Concrete	12	1	1	1		12	Married	SC	0	1000	1		3000	1	1	0		1		G2 b	G2 b	rt Lagophthalmos	10	b	b	1	Plantar lt	1996	0	0	20	M / G	Field	500	M / G	0	P	Open fire	4000	M / G / P
115	M	69	Omalur	Salem	Own	Tiled	24	2	2	1	wife	12	Married	BC	0	1000	1		0	0	0	0	1			G2 b	G2 b	lt Lagophthalmos	10	b	b	1	Plantar	07/2016	0	0	25	M / G / P	Field	450	M / G / P	0	P	Gas	300	M / P
11	F	55	Kolathur	Salem	Own	Thatched	24	1	2	2	w husband	12	Married	BC	Day work	2000	0		0	0	0	0	1		MDT - 2011	G2 b	G1 b	0	6	0	b	0	Tibial lt	2011	2012	0	10	M	Field	30	MG	0	M	Gas	2500	MGP
67	M	76	Salem Urban	Salem	Own	Thatched	24	1	2	2	wife	12	Married	BC	0	1000	1		1200	0	0	0		1		G2 b	G2 lt	0	6	b	lt	0	Plantar	2015	2015	0	30	M / G	Field	150	M / G	0	P	Open fire	2000	M / G / P
65	M	40	Gangavelli	Salem	Own	Tiled	49.5	2	4	2	w family members	12.375	Married	BC	Day Work	2000	0		1500	0	0	0	1		MDT - 2014	G2 b	G2 lt	0	6	b	lt	0	Halux lt	08/2016	08/2016	0	7	P	Field	10	M / G / P	0	P	Gas	50	P
83	M	65	Salem Urban	Salem	Son's	Tiled	25	1	2	2	w wife	12.5	Married	ST	0	1000	1		0	0	0	0		1	Dapson - 1973	G2 b	G2 b	0	8	b	b	1	Tibial lt	1986	0	0	3	M	Field	75	MGP	4	M	Open Fire	35	MGP
18	F	55	Panamarathupatti	Salem	Own	Tiled	42	3	3	1	w husband, sons	14	Married	MBC	0	0	0		5000	0	0	0	1		MDT - 2001	G2 lt, G1 rt	G2 b	0	7	lt	b	0	Plantar rt		10/2015	0	9	MP	Field	150	MG	0	P	Open fire	500	MG
5	F	55	Kolathur	Salem	Own	Tiled	74	2	5	2.5	w children	14.8	Married	MBC	0	1000	1		1500	0	0	0		1	MDT - 2008	G2 lt, G1 rt	G1 b	0	5	lt	0	0	Plantar rt	2015	2015	0	30	MP	Field	50	MGP	0	P	Open fire	100	MGP
24	F	65	Thalaivasal	Salem	Brother's House	Thatched	15	1	1	1		15	Unmarried	SC	0	1000	1		0	0	1	0		1	Dapson - 1974	G2 b	G2 b	lt Iridocyclitis	8	b	b	0	Plantar rt	01/2016	02/2016	0	12	M / P	Field	100	M/ G / P	0	M	Open fire	150	M / P
74	M	74	Gangavelli	Salem	Own	Corrugated sheet	15	1	1	1		15	Married	SC	0	1000	1		0	0	0	0		1	MDT - 1991	G2 b	G2 lt, G1 rt	0	7	b	0	1	Plantar lt & rt, Malleolus rt	10/2016	0	0	12	M	Field	50	M / P	7	M	Open fire	2000	M / G / P
29	F	60	Mechery	Salem	Rented	Concrete	15	1	1	1		15	Widow	BC	Day work	500	0		0	0	0	0		1	MDT - 2006	G2 b	G2 b	0	8	b	b	0	Tibial lt	2006	0	0	25	P	Field	75	MG	3	M	Open Fire	1550	MGP
27	F	58	Gangavelli	Salem	Own	Corrugated sheet	45	3	3	1	w son and daugther in-law	15	Married	SC	0	1000	1		0	0	0	0		1	MDT - 1993	G2 b	G2 b	0	8	b	b	0	Malleolus lt	2014	2014	0	2	P	Field	250	M / G / P	7	P	Open fire	0	0
9	F	60	Salem Urban	Salem	Own, Damien	Tiled	45	3	3	1	w husband, son	15	Married	SC	0	1000	1		2000	0	0	1		1	Dapson - 1983	G2 b	G1 b	0	6	b	0	0	Palmar	1986	1986	0	125	P	Field	500	MGP	0	P	Open Fire	150	MP
28	F	75	Gangavelli	Salem	Own	Concrete	35	3	2	0.666667	w husband	17.5	Married	MBC	0	1000	1		0	0	1	0		1	MDT - 1994	G2 b	G2 b	0	8	b	b	0	Plantar lt	2014	2014	0	15	M / P	Squat Gov'ment Toilet	500	M / P	3	M	Open fire	500	M / P
43	M	37	Thalaivasal	Salem	Own	Corrugated sheet	55	4	3	0.75	w wife and son	18.3333	Married	MBC	0	1000	1		1000	1	0	0	1		MDT - 1996	0	G2 rt	0	2	0	rt	0	Plantar rt, Malleolus rt	2015	04/2016	0	10	M / G	Field	100	M / G	0	P	Gas	0	0
87	M	60	Ayyothiyapattanam	Salem	Own	Tiled	38.25	3	2	0.666667	w sisters son	19.125	Unmarried	MBC	0	0	0		0	1	1	0		1	Dapson - 1976	G2 b	G2 b	0	8	b	b	0	Malleolus rt, Malleolus lt	-	2016	0	15	M / G	Field	20	M / G	0	P	Open fire	0	0
116	M	95	Omalur	Salem	Own	Tiled	20	2	1	0.5		20	Widow	MBC	0	0	0		0	0	1	0		1		G2 b	G2 b	rt Lagophthalmos	10	b	b	1	Plantar lt	09/2016	0	0	3	M	Field	20	M / P	0	P	Open fire	400	M / P
71	M	73	Omalur	Salem	Own	Corrugated sheet	120	8	6	0.75	w family members	20	Married	BC	0	0	0		0	0	0	0		1	Dapson - 1971	G2 rt, G1 lt	G2 rt, G1 lt	0	6	rt	rt	0	Plantar lt	05/2016	10/2016	1	0	P	Sit down	0	P	0	P	Gas	250	P
95	M	65	Veerapandy	Salem	Own	Tiled	80	3	4	1.33333	w wife, family	20	Married	MBC	Self Employed	3000	1		1000	0	0	0	1		MDT - 1996	G2 b	G2 b	0	8	b	b	1	Heel rt	2013	0	0	50	MP	Field	150	MGP	0	P	Gas	310	MGP
64	M	70	Omalur	Salem	Own + Factory	Thatched	140	5	7	1.4	w family members	20	Married	MBC	0	1000	1		1000	0	0	0	1		Dapson - 1986	G2 b	G1 b	0	6	b	0	0	Big toe lt	10/2015	11/2015	0	7	P	Squat	0	P	0	P	Gas	350	MGP
19	F	60	Ayyothiyapattanam	Salem	Own	Tiled	22	1	1	1		22	Widow	ST	Self Employed	2000	1		0	0	0	0		1		G2 rt, G1 lt	G2 b	0	7	rt	b	0	0	1986	1986	0	3	P	Field	50	M / G / P	0	P	Gas	500	M / G / P
13	F	55	Ayyothiyapattanam	Salem	Rented	Tiled	22	1	1	1		22	Separated	MBC	0	1000	1		0	0	0	0		1		G2 b	G1 b	0	6	b	0	0	0	-	0	0	25	M / G / P	Field	75	M / G / P	2	P	Open fire	75	M / G / P
61	M	78	Salem Urban	Salem	Rented	Tiled	140	4	6	1.5	w family	23.3333	Married	BC	0	1000	1		0	0	0	0	1		Dapson - 1971	G2 lt, G1 rt	G1 b	b Iridocyclitis	5	lt	0	0	Plantar lt	2011	2016	0	5	P	Squat Gov'ment Toilet	350	MGP	0	P	Gas	0	-
10	F	65	Mechery	Salem	Own, Gov'ment House	Tiled	24	2	1	0.5		24	Widow	SC	0	1000	1		0	0	0	0		1	MDT - 1996	G2 b	G1 b	0	6	b	0	0	0	0	0	0	13	MP	Field	150	MG	4	MP	Open Fire	10	MGP
33	F	65	Gangavalli	Salem	Own, DTMC Trust	Corrugated sheet	24	1	1	1		24	Widow	MBC	0	1000	1		0	0	0	0		1		G2 b	G2 b	0	8	b	b	1	Toe lt	2014	0	0	100	M / G	Field	50	M / G	3	M	Open fire	250	M / G
3	F	55	Gangavelli	Salem	Own	Thatched	24.5	2	1	0.5		24.5	Widow	ST	Day work	0	0		0	0	0	0		1	MDT - 2014	G2 lt, G1 rt	G1 b	0	4	lt	0	0	0	0	0	0	250	M / P	Field	100	M / P	1	M	Open fire	200	M / P
34	F	70	Ayyothiyapattanam	Salem	Own	Tiled	49	3	2	0.666667	w daughter in law	24.5	Widow	MBC	0	1000	1		0	0	0	0		1		G2 b	G2 b	0	8	b	b	0	Plantar rt	2013	2013	0	75	M / G / P	Field	50	M / G / P	5	M / P	Open fire	50	M / G / P
12	F	70	Ayyothiyapattanam	Salem	Own	Tiled	50	4	2	0.5	husband	25	Married	MBC	0	1000	1		1000	0	0	0		1		G2 b	G1 b	0	6	0	0	0	0	-	0	0	0	P	Squat Toilet	2	P	0	P	Gas	0	0
107	M	70	Ayyothiyapattanam	Salem	Own	Tiled	50	4	2	0.5	w wife	25	Married	MBC	0	1000	1		1000	0	0	0		1		G2 b	G2 b	0	8	b	b	1	Halux lt	10/2016	0	0	0	P	Squat Toilet	2	P	0	P	Gas	0	0
89	M	55	Mechery	Salem	Mother in law's	Tiled	52	3	2	0.666667	w wife	26	Married	MBC	0	1000	1		1000	1	1	0		1	Dapson - 1976	G2 b	G2 b	0	8	b	b	1	Plantar rt	1996	0	0	6	MP	Field	125	MGP	0	P	Gas	0	0
78	M	75	Gangavelli	Salem	Own	Thatched	80	7	3	0.428571	w family members	26.6667	Widow	MBC	0	1000	1		0	0	0	0		1	Dapson - 1980	G2 rt, G1 lt	G2 b	0	7	rt	b	0	Plantar	1976	1976	0	3	M / G	Squat Gov'ment Toilet	150	M / G	0	-	-	150	M / G / P
52	M	75	Veerapandy	Salem	Own	Tiled	60	4	2	0.5	w wife	30	Married	SC	0	1000	1		1000	0	0	0		1	Dapson - 1976	G1 b	G1 b	0	4	b	rt	0	Big toe rt	05/2016	09/2016	0	25	M	Squat	7	MP	3	MP	Open Fire	600	P
76	M	73	Omalur	Salem	Own	Tiled	60	3	2	0.666667	w wife	30	Married	BC	0	1000	1		0	0	0	1	1		Dapson - 1971	G2 lt, G1 rt	G2 b	0	7	lt	b	0	Plantar lt	05/2016	06/2016	0	1	P	Squat	10	MP	4	MP	Open Fire	0	0
42	M	55	Mechery	Salem	Own	Tiled	60	3	2	0.666667	w wife	30	Married	SC	Day work	1500	0		1000	0	0	0	1		Dapson - 1976	0	G2 lt	0	2	0	lt	0	Plantar lt	1986	1990	0	7	MG	Field	100	MG	0	P	Gas	1500	MGP
51	M	60	Gangavelli	Salem	Rented	Tiled	30	1	1	1		30	Married	BC	0	1000	1		1000	0	0	0		1	MDT - 2006	0	G2 b	0	4	0	b	0	Plantar lt	2013	2014	0	60	M / G	Field	30	M / G	0	M / G	Gas	0	0
7	F	65	Salem Urban	Salem	Own	Concrete	65	3	2	0.666667	w husband	32.5	Married	BC	0	15000	1		0	0	0	0		1	Dapson - 1971	G2 b	G1 b	0	6	b	0	0	Plantar rt	10/2015	10/2016	0	7	P	Squat	10	P	0	P	Gas	0	-
110	M	74	Thalaivasal	Salem	Own	Thatched	33	1	1	1		33	Married	SC	0	1000	1		1000	1	1	0		1	Dapson - 1966	G2 lt, G1 rt	G2 b	lt Lagophthalmos	9	lt	b	0	0	-	-	0	10	P	Field	200	M / P	3	P	Open fire	200	M / P
55	M	63	Thalaivasal	Salem	Own	Thatched	33	1	1	1		33	Married	SC	0	1000	1		1000	0	1	0		1	Dapson - 1970	G2 lt	G2 lt	0	4	lt	lt	0	Plantar	1990	1990	0	10	P / M	Field	200	M / P	0	M	Open fire	200	M / P
45	M	65	Gangavelli	Salem	Own	Thatched	36	2	1	0.5		36	Widow	MBC	0	1000	1		0	0	0	0		1	MDT - 2015	0	G1 b	0	2	0	0	1	Plantar lt	2014	0	0	15	P	Field	150	M / G / P	2	P	Open fire	100	M / P
17	F	70	Konganapuram	Salem	Rented	Tiled	37.5	2	1	0.5		37.5	Widow	SC	Self Employed	1200	1		0	0	0	0		1	Dapson - 1982	G2 b	G2 lt, G1 rt	0	7	b	lt	1	Heel rt	11/2016	0	0	5	P	Field	500	MP	3	P	Open Fire	2000	MGP
49	M	79	Gangavelli	Salem	Own	Concrete	80	6	2	0.333333	w wife	40	Married	MBC	0	1800	1		0	0	0	0	1		Dapson - 1972	0	G2 b	0	4	0	b	0	Plantar rt, Malleolus lt	1996	1996	0	1	P	Sit down	1	P	0	P	Gas	50	P
59	M	64	Kolathur	Salem	Own	Concrete	95	4	2	0.5	w wife	47.5	Married	BC	Self Employed	1600	0		0	0	1	0	1		MDT - 2010	G1 lt	G2 b	0	5	0	b	0	Plantar rt	2008	2008	0	7	P	Squat	7	P	0	P	Gas	2000	MGP
84	M	75	Thalaivasal	Salem	Homeless	0	0	0	0	#DIV/0!		#DIV/0!	Separated	BC	0	1000	1		0	1	1	0		1	Dapson - 1976	G2 b	G2 b	0	8	b	b	1	Plantar rt	09/2016	0	0	30	M / P	Field	20	M / G	0	M / G	Open fire	0	0
109	M	65	Thalaivasal	Salem	Homeless	0	0	0	0	#DIV/0!		#DIV/0!	Unmarried	MBC	0	1000	1		0	1	1	0	1		MDT - 1996	G2 lt	G2 b	b Iridocyclitis	8	lt	b	0	Plantar lt	1996	1996	0	15	M / G / P	Field	30	M / G / P	0	P	-	10	P
100	M	72	Gangavelli	Salem	Homeless	0	0	0	0	#DIV/0!		#DIV/0!	Married	MBC	Self Employed	1000	1		0	0	1	0		1	MDT - 2015	G2 b	G2 b	0	8	b	b	0	Malleolus rt, Tibia lt	1996	1996	0	10	M / G	Field	300	M / G	800	M / G	Open fire	500	M / G
